# Supplementary material for: A Key ABA Catabolic Gene, OsABA8ox3, Is Involved in Drought Stress Resistance in Rice
Source: PLoS One. 2015 Feb 3;10(2):e0116646. doi: 10.1371/journal.pone.0116646 (PMC4315402; doi:10.1371/journal.pone.0116646)
Supplement: S4 Table — (XLSX) [file pone.0116646.s006.xlsx]

## Sheet: Sheet1
Probe_Set_ID	Gene Loucs	PEG 0 h			PEG 2 h			Chip fold change
		WT sinal	R9 sinal		WT sinal	R9 sinal		F/C	G/C
Os.4463.1.S1_s_at	LOC_Os06g03670	6.11928	6.68474		12.7566	13.1206		99.5481	128.118
Os.31975.1.S1_x_at	LOC_Os05g10670	7.37593	7.18082		8.67249	10.8625		2.45642	11.2091
Os.12551.1.S1_s_at	LOC_Os05g46480	10.2965	9.35363		12.3009	13.3737		4.01228	8.43997
Os.10933.1.S1_at	LOC_Os01g50910	5.90904	5.97855		12.4508	13.5121		93.1669	194.428
Os.6618.1.S1_at	LOC_Os04g49980	5.23474	6.05087		9.0758	10.0553		14.331	28.2577
Os.53210.1.S1_at	LOC_Os11g26760	7.32003	8.43267		9.82028	11.4067		5.65786	16.9911
Os.3419.1.S1_a_at	LOC_Os01g50700	7.06102	6.67769		10.8657	11.1757		13.9742	17.3239
OsAffx.12887.2.S1_s_at	LOC_Os03g16920	4.98146	4.68507		6.58383	8.45849		3.03642	11.135
os.49648.1.s1_s_at	LOC_Os02g54140	6.13979	6.86151		6.22273	11.5997		1.05917	44.0158
The sinal is Log2 value
